# Supplementary material for: Machine learning aided construction of the quorum sensing communication network for human gut microbiota
Source: PubMed Central journal article supplement (PMC9163137; doi:10.1038/s41467-022-30741-6), 2022-06-02
Supplement: 41467_2022_30741_MOESM1_ESM.pdf [file 41467_2022_30741_MOESM1_ESM.pdf]

# Supplementary Information

## Machine Learning Aided Construction of the Quorum Sensing Communication Network for Human Gut Microbiota

Shengbo Wu<sup>1,2</sup>, Jie Feng<sup>3</sup>, Chunjiang Liu<sup>1,2</sup>, Hao Wu<sup>4</sup>, Zekai Qiu<sup>1</sup>, Jianjun Ge<sup>1</sup>, Shuyang Sun<sup>1</sup>, Xia Hong<sup>1</sup>, Yukun Li<sup>1</sup>, Xiaona Wang<sup>1</sup>, Aidong Yang<sup>5\*</sup>, Fei Guo<sup>6\*</sup>, and Jianjun Qiao<sup>1,4,7\*</sup>

<sup>1</sup> School of Chemical Engineering and Technology, Tianjin University, Tianjin, 300072, China

<sup>2</sup> State Key Laboratory of Chemical Engineering, Tianjin University, Tianjin 300072, China

<sup>3</sup> School of Computer Science and Technology, College of Intelligence and Computing, Tianjin University, Tianjin 300350, China

<sup>4</sup> Zhejiang Shaoxing Research Institute of Tianjin University, Shaoxing, 312300, China

<sup>5</sup> Department of Engineering Science, University of Oxford, Oxford OX1 3PJ, UK

<sup>6</sup> School of Computer Science and Engineering, Central South University, Changsha 410083, China

<sup>7</sup> Key Laboratory of Systems Bioengineering, Ministry of Education (Tianjin University), Tianjin, 300072, China

\*Correspondence and requests for materials should be addressed to

Aidong Yang ([aidong.yang@eng.ox.ac.uk](mailto:aidong.yang@eng.ox.ac.uk))

Fei Guo (email: [guofei@csu.edu.cn](mailto:guofei@csu.edu.cn))

Jianjun Qiao (email: [jianjunq@tju.edu.cn](mailto:jianjunq@tju.edu.cn))

# 1. Structure of the work and key learnings

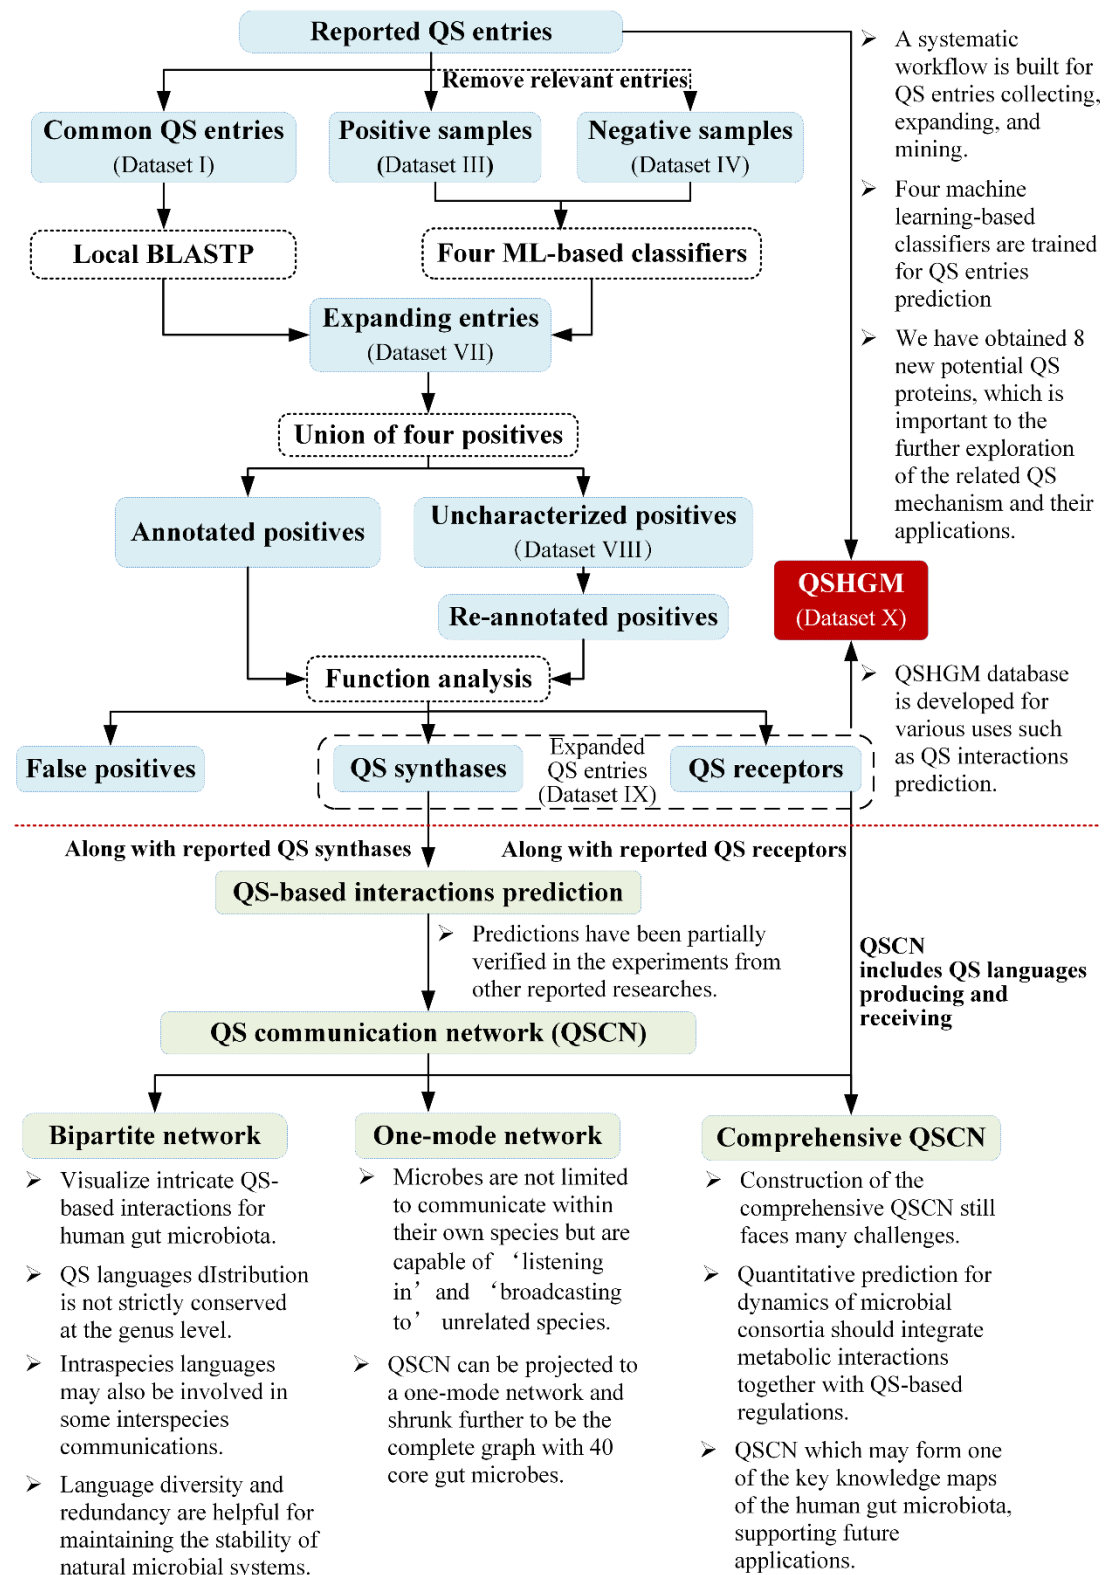

Supplementary Figure 1. A diagram illustrating the structure of the work and key learnings from different parts of the study.

## 2. Overlaps analysis for the annotated and uncharacterized positives

We want to mine potential QS entries for human gut microbes as inclusively as possible. Different classifiers can help us obtain different positives to mine more potential QS entries. We have manually checked their annotations and divided the union of positives into annotated positives (AP) and uncharacterized positives (UP) (Figure 3B), which were analyzed further for their specific overlaps (Supplementary Figure 2) (see more details in Supplementary Data 12). As illustrated in the red box of Supplementary Figure 2, there are 882 and 34 entries shared only by one classifier for annotated and uncharacterized positives, respectively, which indicates the need for the union of the four positives to cover more potential QS entries. Note that the union of positives from SVM and KNN classifiers are predominant, the positives from RF (65 entries for AP, 7 entries for UP) or DNN (134 entries for AP, 8 entries for UP) classifier can supplement entries to some extent. When the positives of three classifiers are combined together, such as SVM/KNN/RF and SVM/KNN/DNN, the positives from the fourth classifier will contribute even less. This indicates that the positives from the above classifiers can cover most of the entries, which is why we did not use any further classifiers.

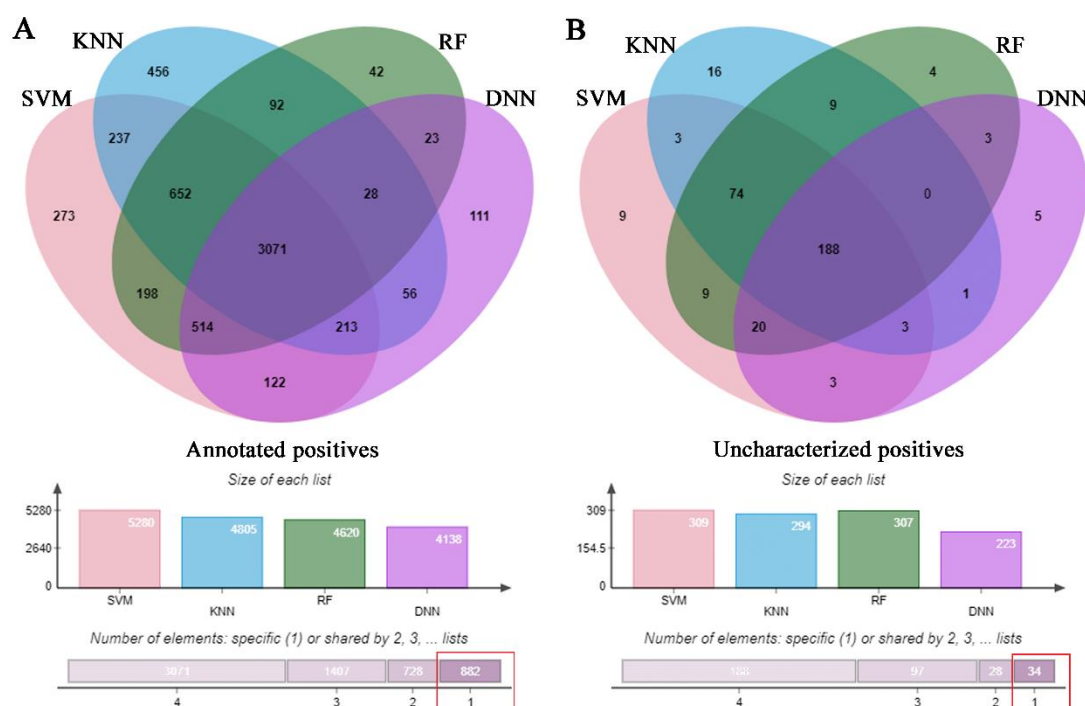

Supplementary Figure 2. The overlaps for the annotated and uncharacterized positives from the four ML-based classifiers.

### 3. QSHGM browsing and searching

To enable user-friendly browsing and searching for entries identified in this work, we constructed a comprehensive QS-related database of human gut microbiota (QSHGM), which is freely available at: <http://www.qshgm.lbci.net/>. A user-friendly “browse” option allows to explore the data including the annotated and extended entries. In the “browse” option, a query box is provided in which the user can enter the query on the basis of “All”, “Synthases” or “Receptors” for the browsing of entries. By “Synthases”, one can query entries according to nine QS languages: AHLs, CAI-1, Dialkylresorcinols, Photopyrones, DSFs, HAQs, AIPs, Indole, and AI-2. As an example, we have illustrated part of browsing results for AHLs language in Supplementary Figure 2, and the output displays information of the entries, fielded by Entry, Genus, Species, Strain, Taxonomic identifier (TaxID), Protein annotations, conventional abbreviations of QS signals (Languages), and Link Address.

QSHGM also includes “Search” searching facilities for different entries. In the search option, a query box is provided in which the user can enter the query on the basis of “Microbes”, “Synthases” or “Receptors” for the searching of entries. By “Microbes”, one can query entries according to different options: Entry (e.g., J7JCP9), Name (e.g., *Pseudomonas aeruginosa*), or TaxID (e.g., 208964). The output displays information of the entries, fielded by Entry, Organism from WMH, TaxID from Uniprot (Uniprot), Proteome ID, substitute organism (Organism), substitute organism TaxID (Organism ID), all protein counts (All Proteins), entry counts for the strain (Counts), and Protein annotations. The “Synthases” is provided according to different options: Entry (e.g., J7JCP9) or Languages (e.g., AHLs). By “Receptors”, one can search with different options: Entry (e.g., P25084) or Annotations (e.g., Histidine kinase). The output displays information of entries, fielded by Entry, Genus, Species, Strain, TaxID, Protein annotations, and Languages. Note that search type allows users to retrieve either an exact match or the match containing the query.



HOME    **BROWSE**    SEARCH    NETWORK    ABOUT    CONTACT

Synthases

| Entry      | Genus         | Species                     | Strain                                      | TaxID   | Protein Annotations                                                             | Languages | Link Address                                                                          |
|------------|---------------|-----------------------------|---------------------------------------------|---------|---------------------------------------------------------------------------------|-----------|---------------------------------------------------------------------------------------|
| A0A154DX32 | Acinetobacter | Acinetobacter baumannii     | Acinetobacter baumannii (Strain: AB3638)    | 470     | N-acyl homoserine lactonase (EC 3.1.1.81)                                       | AHLs      |    |
| F0KJC7     | Acinetobacter | Acinetobacter calcoaceticus | Acinetobacter calcoaceticus (strain PHEA-2) | 871585  | Acyl-homoserine-lactone synthase (EC 2.3.1.184) (Autoinducer synthesis protein) | AHLs      |    |
| G0Z0A0     | Acinetobacter | Acinetobacter baumannii     | Acinetobacter baumannii (Strain: AB3638)    | 470     | Acyl-homoserine-lactone synthase (EC 2.3.1.184) (Autoinducer synthesis protein) | AHLs      |   |
| R8Z564     | Acinetobacter | Acinetobacter lactucae      | Acinetobacter lactucae (Strain: ANC 4052)   | 1785128 | Acyl-homoserine-lactone synthase (EC 2.3.1.184) (Autoinducer synthesis protein) | AHLs      |  |

Supplementary Figure 3. Part of browsing results for AHLs language in QSHGM database.

#### 4. QSCN illustration

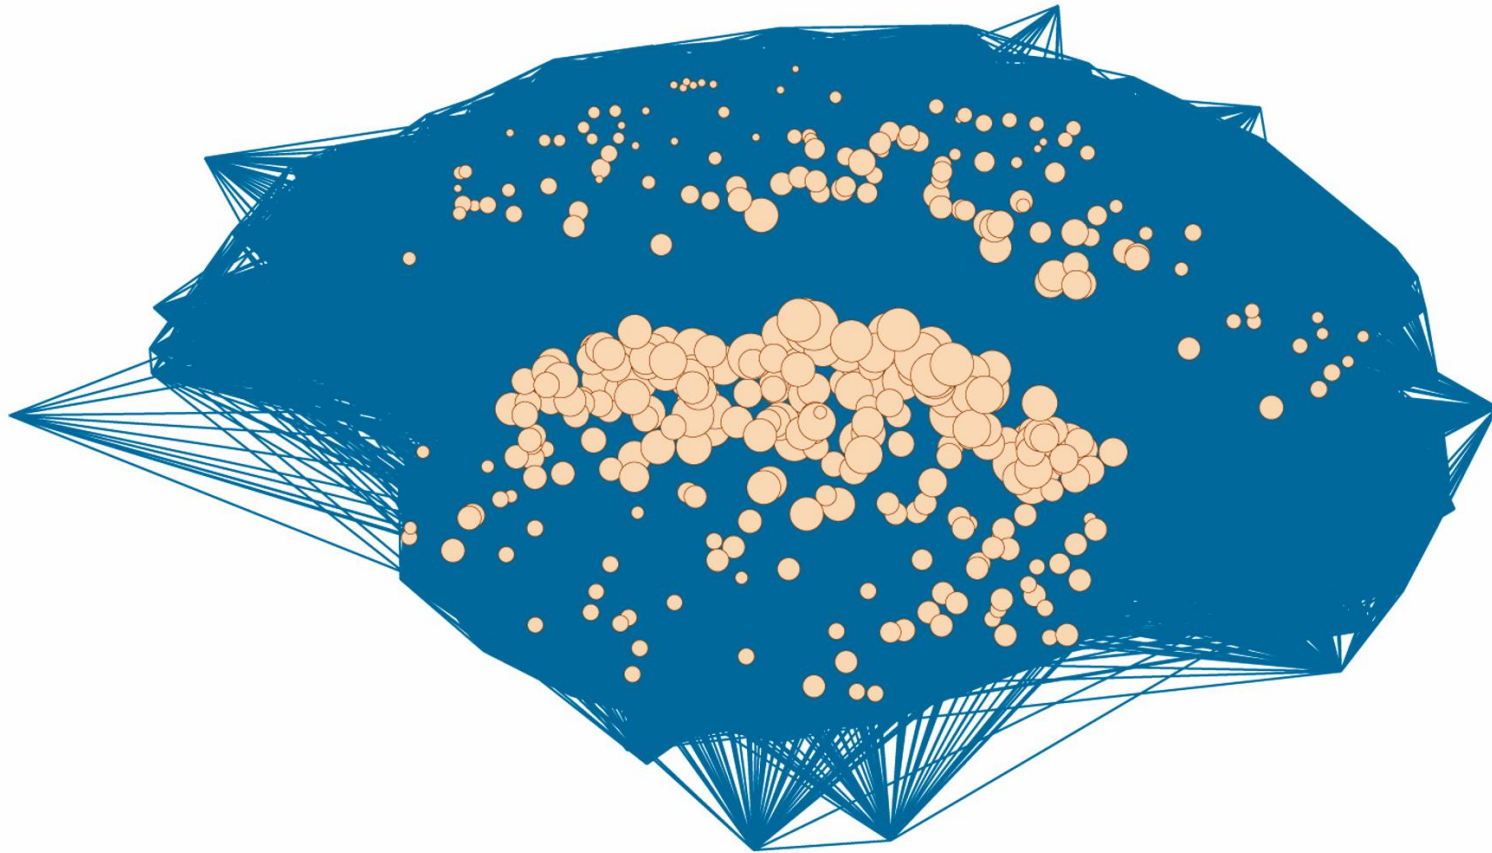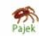

Supplementary Figure 4. Overview of the QS-based microbe-microbe network. Note that the network diagram was generated using Pajek <sup>1</sup>.

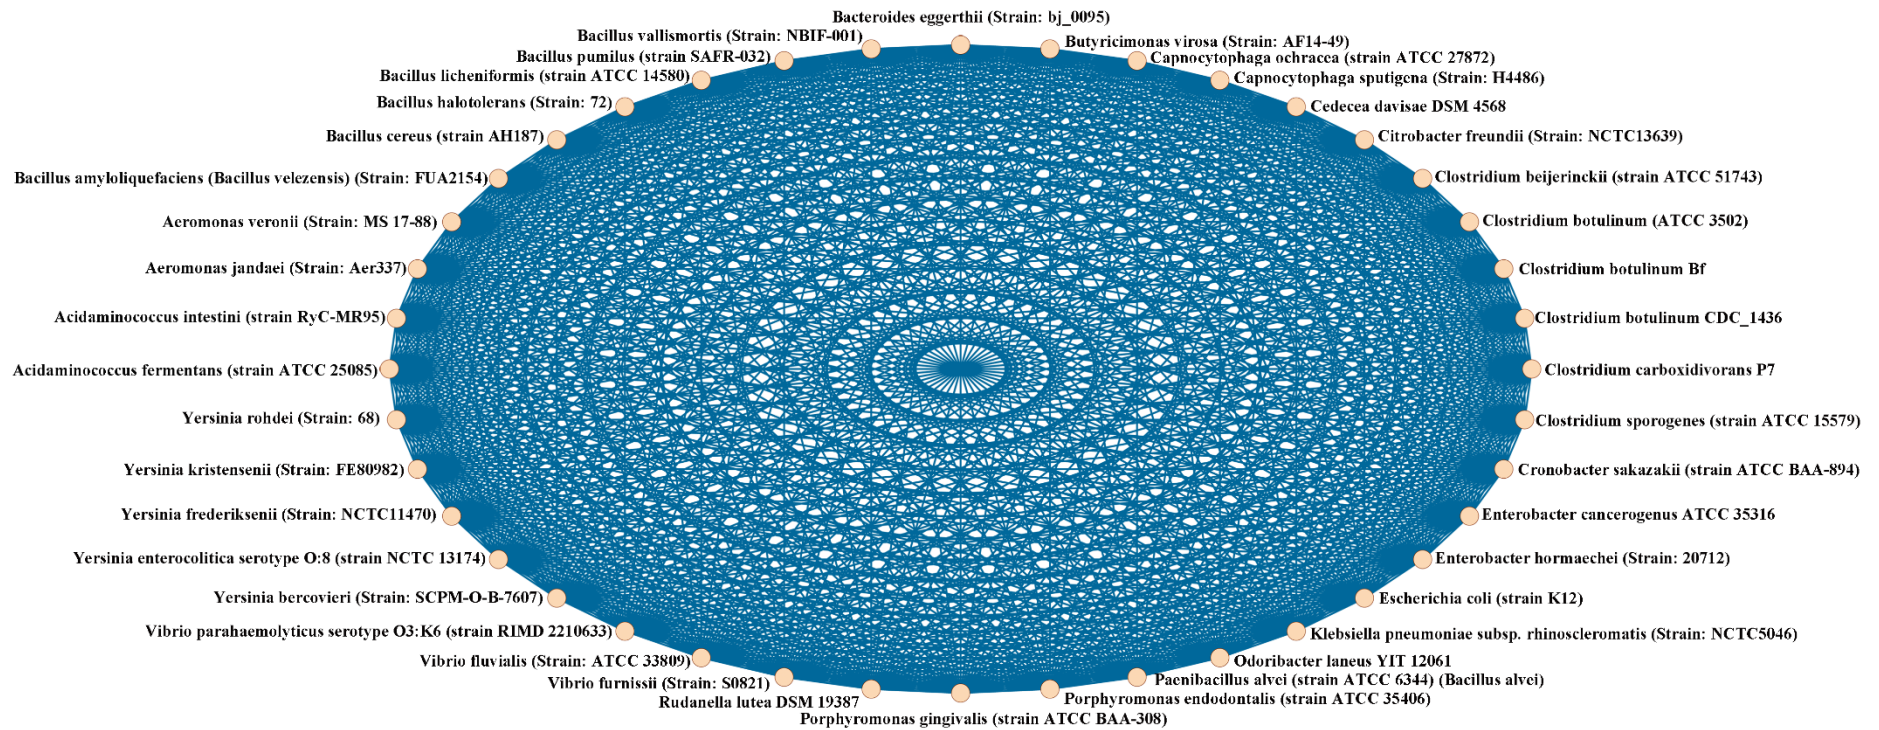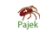

Supplementary Figure 5. A complete graph that links every node to every other node for the 40 core microbes.

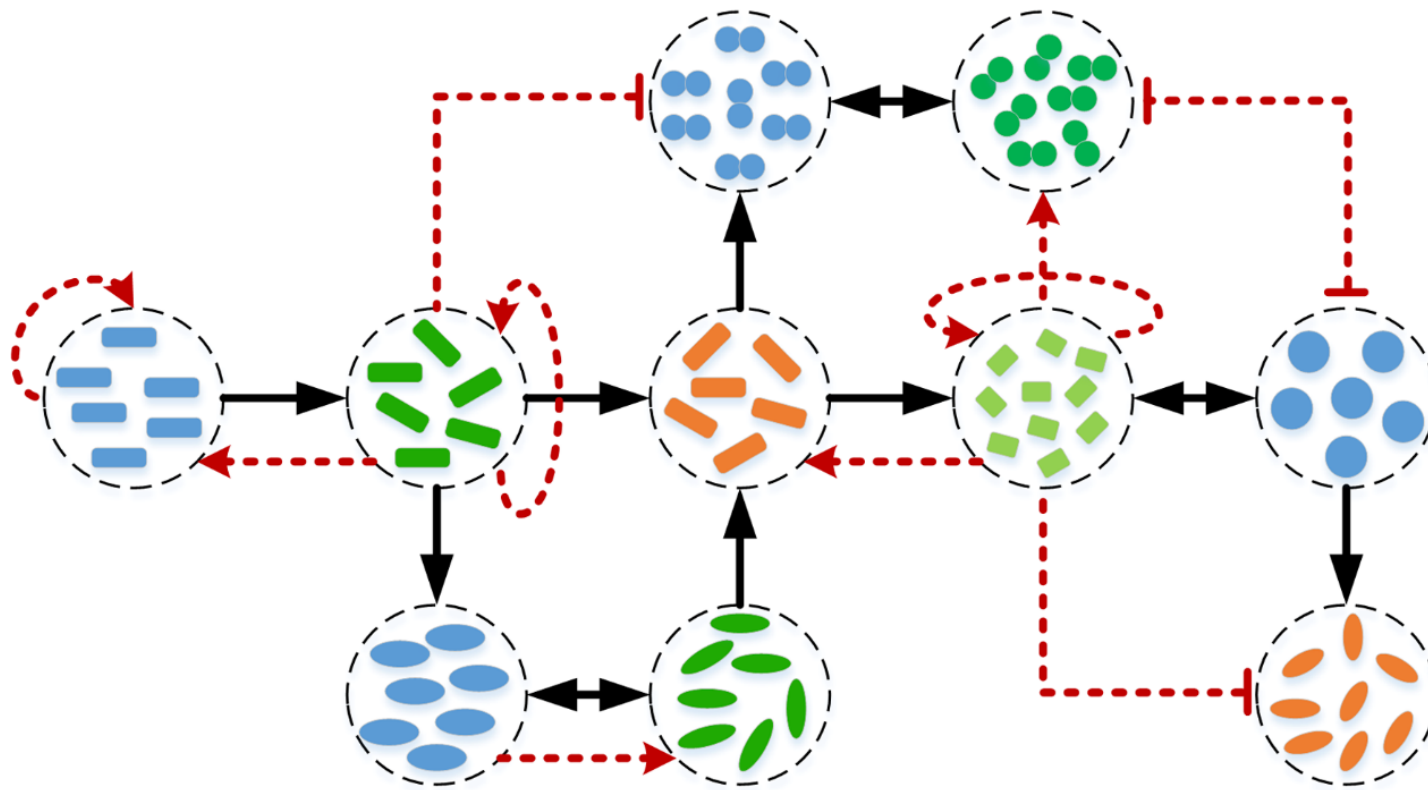

Supplementary Figure 6. Schematic diagram of the comprehensive microbial interaction framework including MIN and QSCN.



## 5. Case study for QSCN

Recently, some studies have described the development of alternative models of a simplified human microbiota consortium (SIHUMI), composed of 7-12 well-characterized and sequenced human-derived enteric bacteria, showing stable microbial and metabolomic characterization<sup>2,3</sup>. Taking the case from Venturelli et al.<sup>3</sup> (involving species BT, BO, BU, BV, BH, CA, CH, DP, EL, ER, FP, and PC) that was based on multiplexed 16S rRNA gene sequencing, we have conducted a qualitative analysis to illustrate the necessity of a combining metabolic interchange network (MIN) and a QSCN. Note that the clustering pattern for the MIN (Original Figure 5e, Supplementary Figure 7b) did not fully recapitulate their interaction relationships of the 12 microbes (Original Figure 2c, Supplementary Figure 7a). Compared with the MIN, the total interaction network of the SIHUMI model is significantly denser, which are not included in the MIN. Venturelli et al. pointed out that signaling molecules may “contribute to the observed ecological relationships” in addition to the exchange of metabolites.

According to the data from the QSHGM database, we can construct the bipartite QSCN for the SIHUMI model (Supplementary Figure 7c). One can find that ten members of the community can communicate based on the AI-2 language (Supplementary Figure 7c), thus leading to a potentially dense QSCN. Note that there is no communication between BT and ER via a QS signal, which is in line with the result of the total interaction network (Supplementary Figure 7a). More importantly, the QSCN we constructed can offer a plausible QS-mediated mechanism for some specific links that their MIN could not explain:

- (i) The prominent links between EL (rather isolated in the MIN) and other strains.
- (ii) Links between CA (as another strain not well-connected in the MIN) and other strains.
- (iii) Two further links, namely CH-DP and ER-BH.

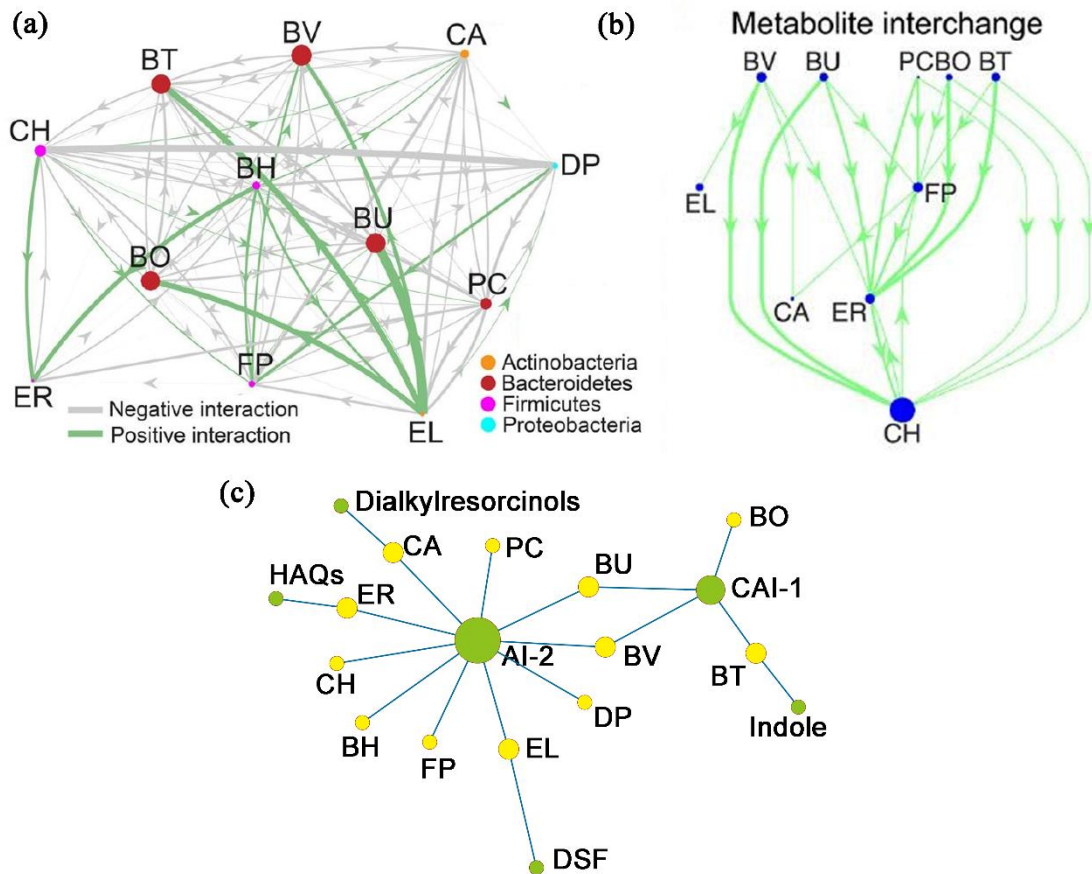

Supplementary Figure 7. Diverse networks for a SIHUMI model. (a) Inferred inter-species interaction for the gLV model trained on the time-resolved experiments from [the original Figure 2c of Venturelli OS et al. <sup>3</sup>](#); (b) Predicted metabolite interchange network representing metabolites that were secreted or utilized by distinct organisms [from the original Figure 5e of Venturelli OS et al. <sup>3</sup>](#); (c) Bipartite QSCN for the SIHUMI model based on QSHGM.

## 6. QS and TCS entries collection in the dataset III

We recognize the possible confusion around the two concepts of QS and Two-component signal transduction systems (TCSs) in this work. TCSs play an important role in microbial communications, which have a certain overlap with QS <sup>4</sup>, but it is difficult to separate the two clearly. Generally, various QS systems can be roughly divided into three types: (i) acylated homoserine lactones (AHLs) and other autoinducers received by LuxR-type receptors utilized by Gram-negative bacteria; (ii) auto-inducing peptides (AIPs) and other autoinducers sensed by two-component systems utilized by Gram-positive bacteria; and (iii) autoinducer 2 (AI-2) and indole for interspecies communication of microbial communities <sup>5</sup>. Here, we have listed functions of the 213 QS entries collected into Dataset I (more details in Supplementary Data 1) in Supplementary Figure 6 to indicate the overlap of QS and TCS, which shows that TCSs form an important part of QS entries.

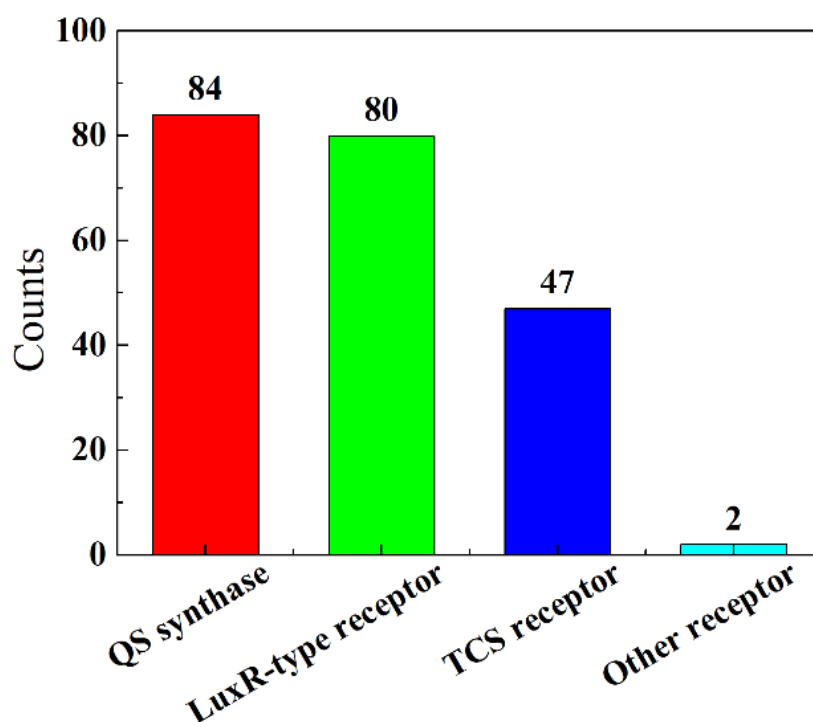

Supplementary Figure 8. Function distribution for the 213 collected QS entries.

While there is strong evidence from the 213 entries mentioned above that many TCS entries possess QS functionality, we agree that not all of them would do so, which would apply to a portion of the TCS entries collected into our Dataset III which was

built with the intention of collecting as many potentially QS-relevant entries as we can. On the other hand, we would like to point out that the entries in Dataset III (QS&TCS) was subsequently used as positive samples to train the classifiers; the predicted positive entries by applying the trained classifiers to the Dataset VII (resulting from Local BLASTP) were eventually checked manually to confirm QS functions. Out of 9253 entries (Dataset VII), 7184 were confirmed to be QS relevant, which represents a very high percentage. Therefore, although it is difficult to say exactly what is the proportion of the TCS entries collected in our final database that are not QS relevant, we anticipate that the proportion is likely to be moderate. Nevertheless, there is a need to make an explicit statement about the existence of such proportion so that the users are warned of encountering none-QS TCS entries, even though these entries would still be relevant to inter-cellular communication.

## 7. Potential applications of QSHGM and QSCN

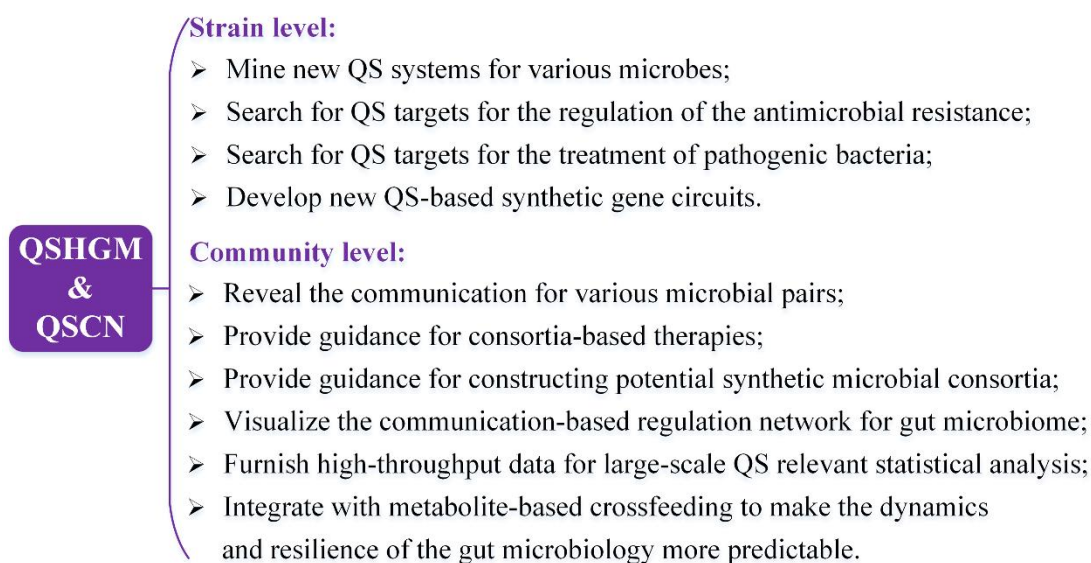

Supplementary Figure 9. Summarization for the potential applications of QSHGM and QSCN at strain and community level.

## 8. Tables for the corresponding content

Supplementary Table 1. The details for the datasets listed in the Figure 1.

| Dataset   | Input                                                                                    | Output                                                                 | Suppl. Table                                                                                                                           |
|-----------|------------------------------------------------------------------------------------------|------------------------------------------------------------------------|----------------------------------------------------------------------------------------------------------------------------------------|
| I         | Reported entries from Sigmol and Quorumpeps database                                     | <b>213</b> reported QS entries                                         | 1                                                                                                                                      |
| II        | Proteomes of human gut microbes from UniProt                                             | Proteomes of <b>818</b> gut microbes from VMH.                         | <a href="https://pan.baidu.com/s/1o46nn1b7L5nvCqgpwW7Zlw">https://pan.baidu.com/s/1o46nn1b7L5nvCqgpwW7Zlw</a><br><b>Password: tfnx</b> |
| III       | Collected QS and TCS entries from Dataset II                                             | Positive samples ( <b>21,383</b> entries)                              | 2                                                                                                                                      |
| IV        | Remove QS and TCS entries in cluster rules from typical strains in Dataset II            | Negative samples ( <b>22,780</b> entries)                              | 3                                                                                                                                      |
| V         | Results of the Local BLASTP                                                              | Results of local BLASTP with $E \leq 10^{-5}$ ( <b>14,573</b> entries) | 4                                                                                                                                      |
| VI        | Overlaps of entries in Dataset III and V                                                 | <b>5,320</b> reported entries                                          | 5                                                                                                                                      |
| VII       | Entries by excluding Dataset VI for Dataset V                                            | <b>9,253</b> entries to be classified                                  | 6                                                                                                                                      |
| VIII      | Union of uncharacterized proteins from the positives of RF, SVM, KNN, or DNN classifiers | <b>534</b> un-annotated entries to be mined                            | 7                                                                                                                                      |
| IX        | The extended QS entries obtained by the union of four classifiers                        | <b>7,184</b> extended entries                                          | 8                                                                                                                                      |
| Output S3 | Proteins without QS functions                                                            | <b>438</b> false positives                                             | 9                                                                                                                                      |
| X         | The total entries from the reported and extended QS/TCS entries                          | <b>28,567</b> redundancy removal entries                               | 10                                                                                                                                     |

Supplementary Table 2. Details of the selected nine types of QS languages

| Type          | Languages                  | Acronym | Synthase                                  | Reported microbes                                                 | Refer. |
|---------------|----------------------------|---------|-------------------------------------------|-------------------------------------------------------------------|--------|
| Intra-species | Acyl-homoserine lactones   | AHLs    | Diverse I proteins (e.g., LuxI)           | Most of Gram-negative bacteria (e.g., <i>Vibrio fischeri</i> )    | 6      |
|               | Diffusible signal factors  | DSFs    | RpfF                                      | <i>Xanthomonas campestris</i>                                     | 7      |
|               | 4-hydroxy-2-alkylquinoline | HAQs    | PqsA                                      | <i>Pseudomonas aeruginosa</i>                                     | 8      |
|               | Cholera autoinducer 1      | CAI-1   | CqsA                                      | <i>Vibrio spp.</i>                                                | 9      |
|               | Dialkylresorcinols         | DARs    | DarB                                      | <i>Photorhabdus asymbiotica</i>                                   | 10     |
|               | Photopyrones               | -       | PpyS                                      | <i>Photorhabdus luminescens</i>                                   | 11     |
|               | Auto-inducing peptides     | AIPs    | Synthases of signal peptides (e.g., NisA) | Most of Gram-positive bacteria (e.g., <i>Lactococcus lactis</i> ) | 12     |
| Inter-species | Indole                     | -       | TnaA                                      | Some microbes (e.g., <i>Escherichia coli</i> )                    | 13     |
|               | Autoinducer 2              | AI-2    | LuxS                                      | Most of microbes (e.g., <i>Vibrio harveyi</i> )                   | 14     |

Supplementary Table 3. Hypotheses and future improvements for the QSCN

| Items        | Hypotheses                                                                      | Future improvements for QSCN                                                                         |
|--------------|---------------------------------------------------------------------------------|------------------------------------------------------------------------------------------------------|
| Microbe      | Human gut microbiome consists of 818 microbes from VMH database.                | Enlarge the number and range of gut microbes.                                                        |
| Language     | There are nine types of QS languages.                                           | Develop the QSCN for more AIPs and novel QS languages.                                               |
| TCS          | TCS entries possess QS functionality.                                           | Figure out the differences and connections between QS and TCS.                                       |
| Cheating     | All producers are also receivers to the same QS language.                       | Construct a directed and more accurate QSCN differentiating QS languages producing and receiving.    |
| QS Crosstalk | Microbes that speak the same type of languages can communicate with each other. | Quantify the intensity of QS crosstalk for the same type of QS languages to develop a weighted QSCN. |

Supplementary Table 4. Key nodes with high degree and betweenness centrality (BC)

| Strains                                                            |                | Degree | BC       |
|--------------------------------------------------------------------|----------------|--------|----------|
| Acidaminococcus fermentans (strain ATCC 25085)                     | Firmicutes     | 712    | 0.00225  |
| Acidaminococcus intestini (strain RyC-MR95)                        | Firmicutes     | 749    | 0.002698 |
| Aeromonas jandaei (Strain: Aer337)                                 | Proteobacteria | 699    | 0.002438 |
| Aeromonas veronii (Strain: MS 17-88)                               | Proteobacteria | 699    | 0.002438 |
| Bacillus amyloliquefaciens (Bacillus velezensis) (Strain: FUA2154) | Firmicutes     | 712    | 0.00225  |
| Bacillus cereus (strain AH187)                                     | Firmicutes     | 749    | 0.002698 |
| Bacillus halotolerans (Strain: 72)                                 | Firmicutes     | 712    | 0.00225  |
| Bacillus licheniformis (strain ATCC 14580)                         | Firmicutes     | 749    | 0.002698 |
| Bacillus pumilus (strain SAFR-032)                                 | Firmicutes     | 749    | 0.002698 |
| Bacillus vallismortis (Strain: NBIF-001)                           | Firmicutes     | 712    | 0.00225  |
| Bacteroides eggerthii (Strain: bj_0095)                            | Bacteroidetes  | 702    | 0.002624 |
| Butyricimonas virosa (Strain: AF14-49)                             | Bacteroidetes  | 723    | 0.002231 |
| Capnocytophaga ochracea (strain ATCC 27872)                        | Bacteroidetes  | 746    | 0.003047 |
| Capnocytophaga sputigena (Strain: H4486)                           | Bacteroidetes  | 723    | 0.002231 |
| Cedecea davisae DSM 4568                                           | Proteobacteria | 714    | 0.002073 |
| Citrobacter freundii (Strain: NCTC13639)                           | Proteobacteria | 720    | 0.003004 |
| Clostridium beijerinckii (strain ATCC 51743)                       | Firmicutes     | 711    | 0.00226  |
| Clostridium botulinum (ATCC 3502)                                  | Firmicutes     | 712    | 0.00225  |
| Clostridium botulinum Bf                                           | Firmicutes     | 711    | 0.002616 |
| Clostridium botulinum CDC_1436                                     | Firmicutes     | 712    | 0.00225  |
| Clostridium carboxidivorans P7                                     | Firmicutes     | 712    | 0.00225  |
| Clostridium sporogenes (strain ATCC 15579)                         | Firmicutes     | 736    | 0.003093 |
| Cronobacter sakazakii (strain ATCC BAA-894)                        | Proteobacteria | 714    | 0.002073 |
| Enterobacter cancerogenus ATCC 35316                               | Proteobacteria | 714    | 0.002073 |
| Enterobacter hormaechei (Strain: 20712)                            | Proteobacteria | 736    | 0.002842 |
| Escherichia coli (strain K12)                                      | Proteobacteria | 702    | 0.002624 |
| Klebsiella pneumoniae subsp. rhinoscleromatis (Strain: NCTC5046)   | Proteobacteria | 736    | 0.002842 |
| Odoribacter laneus YIT 12061                                       | Bacteroidetes  | 748    | 0.003068 |
| Paenibacillus alvei (strain ATCC 6344) (Bacillus alvei)            | Firmicutes     | 771    | 0.003565 |
| Porphyromonas endodontalis (strain ATCC 35406)                     | Bacteroidetes  | 723    | 0.002231 |
| Porphyromonas gingivalis (strain ATCC BAA-308)                     | Bacteroidetes  | 723    | 0.002231 |
| Rudanella lutea DSM 19387                                          | Bacteroidetes  | 749    | 0.002698 |
| Vibrio fluvialis (Strain: ATCC 33809)                              | Proteobacteria | 751    | 0.003554 |
| Vibrio furnissii (Strain: S0821)                                   | Proteobacteria | 730    | 0.002707 |
| Vibrio parahaemolyticus serotype O3:K6 (strain RIMD 2210633)       | Proteobacteria | 730    | 0.002707 |
| Yersinia bercovieri (Strain: SCPM-O-B-7607)                        | Proteobacteria | 716    | 0.002234 |
| Yersinia enterocolitica serotype O:8 (strain NCTC 13174)           | Proteobacteria | 730    | 0.002707 |
| Yersinia frederiksenii (Strain: NCTC11470)                         | Proteobacteria | 730    | 0.002707 |
| Yersinia kristensenii (Strain: FE80982)                            | Proteobacteria | 728    | 0.002542 |
| Yersinia rohdei (Strain: 68)                                       | Proteobacteria | 730    | 0.002707 |

Supplementary Table 5. Design and optimization of synthetic microbial consortia based on QS

| Time | QS system                           | Microbial community                  | Achieved function                                                             | Refs. |
|------|-------------------------------------|--------------------------------------|-------------------------------------------------------------------------------|-------|
| 2002 | <i>lux</i>                          | <i>E. coli</i>                       | Synchronizing genetic relaxation oscillators by intercell signaling           | 15    |
| 2004 | <i>lux</i>                          | <i>E. coli</i>                       | Population control of an <i>E. coli</i> population by QS-regulated killing    | 16    |
| 2008 | <i>lux, las</i>                     | <i>E. coli-E. coli</i>               | Construct a <i>E. coli</i> predator-prey ecosystem                            | 17    |
| 2009 | <i>lux, las</i>                     | <i>E. coli-E. coli</i>               | Spatial and temporal dynamics of a QS-regulated synthetic ecosystem           | 18    |
| 2010 | <i>lux</i>                          | <i>E. coli</i>                       | Construct a synchronized QS-regulated genetic clocks                          | 19    |
| 2012 | <i>las</i>                          | <i>E. coli-E. coli</i>               | Synthetic QS circuit to control consortial biofilm formation and dispersal    | 20    |
| 2014 | <i>las, rhl</i>                     | <i>P. aeruginosa</i>                 | Combinatorial QS to resolve microbial social and physical environment         | 21    |
| 2015 | <i>cin, rhl</i>                     | <i>E. coli-E. coli</i>               | Investigate emergent genetic oscillations in a synthetic microbial consortium | 22    |
| 2016 | <i>lux, las, rpa, tra</i>           | <i>E. coli-E. coli</i>               | Investigate QS communication modules for microbial consortia                  | 23    |
| 2017 | <i>lux, rpa</i>                     | <i>S. typhimurium-S. typhimurium</i> | A stabilized microbial ecosystem by QS-based synchronized lysis circuits      | 24    |
| 2017 | <i>esa</i>                          | <i>E. coli</i>                       | Construct a QS-based metabolic toggle switch for myo-inositol production      | 25    |
| 2018 | <i>AIP (nisin)</i>                  | <i>L. lactis-L. lactis-L. lactis</i> | Designing microbial consortia with defined social interactions based on nisin | 26    |
| 2018 | <i>rhl, lux, tra, las, cin, rpa</i> | <i>E. coli-E. coli-E. coli-</i>      | Engineer the coordinated system behavior in synthetic microbial consortia     | 27    |
| 2019 | <i>lux</i>                          | <i>E. coli-E. coli-E. coli</i>       | QS-based self-limiting synchronized lysis for microbial population            | 28    |
| 2019 | <i>cin, rhl</i>                     | <i>E. coli-E. coli</i>               | Long-range temporal coordination of gene expression in synthetic consortia    | 29    |
| 2020 | <i>cin, rhl</i>                     | <i>E. coli-E. coli</i>               | Majority sensing in synthetic microbial consortia                             | 30    |
| 2020 | <i>lux, irpa</i>                    | <i>E. coli-E. coli</i>               | Construct inducible QS-regulated synthetic microbial communities              | 31    |
| 2020 | <i>AIP</i>                          | <i>L. lactis-L. lactis</i>           | Interaction variability shapes succession of synthetic microbial ecosystems   | 32    |
| 2021 | Bacteriocin QS                      | <i>E. coli-E. coli-E. coli</i>       | Design of synthetic consortia with QS-based amensal bacteriocin interaction   | 33    |
| 2021 | <i>lux, las</i>                     | <i>E. coli-E. coli</i>               | Combinational QS devices for dynamic control in cocultivation                 | 34    |



Supplementary Table 6. Different characteristics of MINs and QSCNs

| <b>Items</b>             | <b>MIN</b>                                                                              | <b>QSCN</b>                                                         |
|--------------------------|-----------------------------------------------------------------------------------------|---------------------------------------------------------------------|
| <b>Type</b>              | Metabolite utilization network                                                          | Population-level signaling network                                  |
| <b>Basis</b>             | Metabolism of various substances or intermediates                                       | Quorum sensing regulation systems                                   |
| <b>Nodes</b>             | Strains                                                                                 | Microbial communities                                               |
| <b>Edges</b>             | Metabolic interactions                                                                  | Autoinducer-based regulations                                       |
| <b>Molecules</b>         | Various common metabolites (such as amino acid)                                         | Diverse specific autoinducers (such as AHLs and AI-2)               |
| <b>Proteins</b>          | Enzymes are the majority (such as enzymes in glycolysis)                                | Specific QS receptors (such as LuxR, LsrB, SdiA)                    |
| <b>Interactions</b>      | Catalytic reactions of different substrates or intermediates                            | Binding of autoinduces and receptors                                |
| <b>Analytical tools</b>  | Reconstruction of metabolic networks (such as FBA) and other constraint-based modelling | Modelling based on corresponding QS mechanisms                      |
| <b>Functional nature</b> | Conservation of substance                                                               | Genetic circuits regulation                                         |
| <b>Applications</b>      | Optimization of metabolic engineering; microbial ecology analysis                       | Design of synthetic microbial consortia; microbial ecology analysis |

## References

1. Batagelj V, Mrvar A. Pajek-program for large network analysis. 11 (1998).
2. Colosimo DA, *et al.* Mapping interactions of microbial metabolites with human g-protein-coupled receptors. *Cell. Host. Microbe.* **26**, 273-282 e277 (2019).
3. Venturelli OS, *et al.* Deciphering microbial interactions in synthetic human gut microbiome communities. *Mol. Syst. Biol.* **14**, e8157 (2018).
4. Wang S, Payne GF, Bentley WE. Quorum sensing communication: Molecularly connecting cells, their neighbors, and even devices. *Annu. Rev. Chem. Biomol. Eng.* **11**, 447-468 (2020).
5. Wu S, Liu J, Liu C, Yang A, Qiao J. Quorum sensing for population-level control of bacteria and potential therapeutic applications. *Cell. Mol. Life Sci.* **77**, 1319-1343 (2020).
6. Fuqua WC, Winans SC, Greenberg EP. Quorum sensing in bacteria: The luxr-luxI family of cell density-responsive transcriptional regulators. *J. Bacteriol.* **176**, 269-275 (1994).
7. Deng YY, Wu JE, Tao F, Zhang LH. Listening to a new language: Dsf-based quorum sensing in gram-negative bacteria. *Chem. Rev.* **111**, 160-173 (2011).
8. Déziel E, *et al.* Analysis of pseudomonas aeruginosa 4-hydroxy-2-alkylquinolines (haqs) reveals a role for 4-hydroxy-2-heptylquinoline in cell-to-cell communication. *Proc Natl Acad Sci U S A* **101**, 1339-1344 (2004).
9. Higgins DA, Pomianek ME, Kraml CM, Taylor RK, Semmelhack MF, Bassler BL. The major vibrio cholerae autoinducer and its role in virulence factor production. *Nature* **450**, 883-886 (2007).
10. Brameyer S, Kresovic D, Bode HB, Heermann R. Dialkylresorcinols as bacterial signaling molecules. *Proceedings of the National Academy of Sciences* **112**, 572-577 (2015).
11. Brachmann AO, *et al.* Pyrones as bacterial signaling molecules. *Nat. Chem. Biol.* **9**, 573-578 (2013).
12. Monnet V, Juillard V, Gardan R. Peptide conversations in gram-positive bacteria. *Crit. Rev. Microbiol.* **42**, 339-351 (2014).
13. Wang D, Ding X, Rather PN. Indole can act as an extracellular signal in escherichia coli. *J. Bacteriol.* **183**, 4210-4216 (2001).
14. Chen X, *et al.* Structural identification of a bacterial quorum-sensing signal containing boron. *Nature* **415**, 545-549 (2002).
15. David M, Nancy K, Jeff H, J J C. Synchronizing genetic relaxation oscillators by intercell signaling. *Proc. Natl Acad. Sci. USA* **99**, 679-684 (2002).
16. You L, Cox RS, 3rd, Weiss R, Arnold FH. Programmed population control by cell-cell communication and regulated killing. *Nature* **428**, 868-871 (2004).
17. Balagaddé FK, *et al.* A synthetic escherichia coli predator-prey ecosystem. *Mol. Syst. Biol.* **4**, 187 (2008).
18. Song H, Payne S, Gray M, You L. Spatiotemporal modulation of biodiversity in

- a synthetic chemical-mediated ecosystem. *Nat. Chem. Biol.* **5**, 929-935 (2009).
19. Danino T, Mondragon-Palomino O, Tsimring L, Hasty J. A synchronized quorum of genetic clocks. *Nature* **463**, 326-330 (2010).
  20. Hong SH, Hegde M, Kim J, Wang X, Jayaraman A, Wood TK. Synthetic quorum-sensing circuit to control consortial biofilm formation and dispersal in a microfluidic device. *Nat. Commun.* **3**, 613 (2012).
  21. Cornforth DM, *et al.* Combinatorial quorum sensing allows bacteria to resolve their social and physical environment. *Proc Natl Acad Sci U S A* **111**, 4280-4284 (2014).
  22. Chen Y, Kim JK, Hirning AJ, Josic K, Bennett MR. Synthetic biology. Emergent genetic oscillations in a synthetic microbial consortium. *Science* **349**, 986-989 (2015).
  23. Scott SR, Hasty J. Quorum sensing communication modules for microbial consortia. *Acs. Synth. Biol.* **5**, 969-977 (2016).
  24. Scott SR, Din MO, Bittihn P, Xiong L, Tsimring LS, Hasty J. A stabilized microbial ecosystem of self-limiting bacteria using synthetic quorum-regulated lysis. *Nat. Microbiol.* **2**, 17083 (2017).
  25. Gupta A, Reizman IM, Reisch CR, Prather KL. Dynamic regulation of metabolic flux in engineered bacteria using a pathway-independent quorum-sensing circuit. *Nat. Biotechnol.* **35**, 273-279 (2017).
  26. Kong W, Meldgin DR, Collins JJ, Lu T. Designing microbial consortia with defined social interactions. *Nat. Chem. Biol.* **14**, 821-829 (2018).
  27. Kylilis N, Tuza ZA, Stan GB, Polizzi KM. Tools for engineering coordinated system behaviour in synthetic microbial consortia. *Nat. Commun.* **9**, 2677 (2018).
  28. Liao MJ, Din MO, Tsimring L, Hasty J. Rock-paper-scissors: Engineered population dynamics increase genetic stability. *Science* **365**, 1045-1049 (2019).
  29. Kim JK, Chen Y, Hirning AJ, Alnahhas RN, Josic K, Bennett MR. Long-range temporal coordination of gene expression in synthetic microbial consortia. *Nat. Chem. Biol.* **15**, 1102-1109 (2019).
  30. Alnahhas RN, *et al.* Majority sensing in synthetic microbial consortia. *Nat. Commun.* **11**, 3659 (2020).
  31. Miano A, Liao MJ, Hasty J. Inducible cell-to-cell signaling for tunable dynamics in microbial communities. *Nat. Commun.* **11**, 1193 (2020).
  32. Liu F, *et al.* Interaction variability shapes succession of synthetic microbial ecosystems. *Nat. Commun.* **11**, 309 (2020).
  33. Karkaria BD, Fedorec AJH, Barnes CP. Automated design of synthetic microbial communities. *Nat. Commun.* **12**, 672 (2021).
  34. Wu S, *et al.* Combinational quorum sensing devices for dynamic control in cross-feeding cocultivation. *Metab. Eng.* **67**, 186-197 (2021).
