# Supplementary material for: Machine learning aided construction of the quorum sensing communication network for human gut microbiota
Source: PubMed Central journal article supplement (PMC9163137; doi:10.1038/s41467-022-30741-6), 2022-06-02
Supplement: 41467_2022_30741_MOESM17_ESM.pdf [file 41467_2022_30741_MOESM17_ESM.pdf]

**Title:** Supplementary Data 1.

**Description:** Reported QS entries from Sigmol and Quorumpeps.

**Title:** Supplementary Data 2.

**Description:** Positive samples for the collected QS entries.

**Title:** Supplementary Data 3.

**Description:** Negative samples collection.

**Title:** Supplementary Data 4.

**Description:** Results of local BLASTP with  $E \leq 10^{-5}$  (Dataset V).

**Title:** Supplementary Data 5.

**Description:** Overlaps of QS entries in dataset III and V (Dataset VI).

**Title:** Supplementary Data 6.

**Description:** Protein dataset excluded dataset VI for dataset V (VII).

**Title:** Supplementary Data 7.

**Description:** Uncharacterized proteins from four classifiers (VIII).

**Title:** Supplementary Data 8.

**Description:** Extended entries obtained by four classifiers (IX).

**Title:** Supplementary Data 9.

**Description:** False positives obtained by four classifiers (S3).

**Title:** Supplementary Data 10.

**Description:** Data for QSHGM database (X).

**Title:** Supplementary Data 11.

**Description:** Function analysis for positive entries.

**Title:** Supplementary Data 12.

**Description:** Overlaps for AP and UP.

**Title:** Supplementary Data 13.

**Description:** QS Communication network data for pajek.
